# Supplementary material
Source: PubMed Central journal article supplement (PMC3907936)
Supplement: NIHMS546730-supplement-Supplemental_Data.pdf [file NIHMS546730-supplement-Supplemental_Data.pdf]

## **Online Supplement**

### **Supplementation of nitric oxide attenuates A $\beta$ PP and BACE1 protein levels in cerebral microcirculation of eNOS-deficient mice**

**Austin, SA , d'Uscio, LV, and Katusic, ZS.**

Contents:

1. Supplemental methods
2. Supplemental tables/figures

## **Supplemental Methods**

### **Animals**

Male wild type (C57BL6) and eNOS<sup>-/-</sup> (Nos3<sup>tm1Unc/J</sup>) mice were purchased from Jackson Laboratory (Bar Harbor, ME). Mice had free access to food and water. Wild type and eNOS<sup>-/-</sup> mice, 4 months of age, were treated with 30 mg/kg nitroglycerine b.i.d. or vehicle, via subcutaneous injections, for 3 days[1]. Upon completion of 3 day treatment, mice were sacrificed by lethal dose of pentobarbital. All animal care and use were approved by Mayo institutional Animal Care and Use Committee.

### **Glucose and Cholesterol measurements**

Glucose was measured in whole blood using Accu Check (Roche Diagnostics, Indianapolis, IN). Blood was centrifuged (2,000 rpm, 10 mins, 4°C) and stored at -80° until all samples were collected. Total cholesterol levels were measured using the Hitachi 912 chemistry analyzer (Roche Diagnostics).

### **Blood pressure**

Mice were trained for blood pressure measurements. Systolic blood pressure was measured before and at the end of treatment in non-anesthetized mice using the tail cuff method as previously described[2](Harvard Apparatus Ltd, Kent, England).

### **Cerebral microvessel isolation**

Cerebral microvessels were isolated from brain tissue, devoid of large vessels, as previously described[3]. Tissue was homogenized in ice cold PBS with Dounce homogenizer and rinsed

twice in PBS. The resulting pellet was resuspended and layered over 15% Dextran/PBS (Sigma, St. Louis, MO) and centrifuged at 4500g for 30 minutes at 4°C. The supernatant was discarded and the final pellet was resuspended in 1% bovine serum albumin (BSA), the suspension was then passed through a 40 µm nylon mesh (BD Falcon). Microvessels were washed with 1% BSA/PBS and collected by centrifugation. Microvessels were resuspended in lysis buffer according to assay instructions.

### **Aβ ELISA**

Aβ<sub>40</sub> and Aβ<sub>42</sub> from brain tissue lysates was measured using a commercially available colorimetric ELISA kit following manufacturer's instructions (Covance, Princeton, NJ).

Supplemental Table 1. Characteristics of wild type and eNOS<sup>-/-</sup> mice treated with nitroglycerin

| Systolic Blood pressure (mm Hg) | Wild type   |               | eNOS <sup>-/-</sup> |               |
|---------------------------------|-------------|---------------|---------------------|---------------|
|                                 | Vehicle     | Nitroglycerin | Vehicle             | Nitroglycerin |
| Before treatment                | 115.31±4.97 | 116.11±4.42   | 134.90±3.53*        | 133.87±3.58*  |
| After treatment                 | 116.09±2.12 | 112.92±1.95   | 131.54±3.67*        | 130.04±2.38*  |

  

| Parameter                 | Wild type        |                  | eNOS <sup>-/-</sup> |               |
|---------------------------|------------------|------------------|---------------------|---------------|
|                           | Vehicle          | Nitroglycerin    | Vehicle             | Nitroglycerin |
| Body weight (g)           | 31.32±2.21       | 31.69±2.35       | 28.62±2.08*         | 28.69±2.12*   |
| Total Cholesterol (mg/dL) | 79.13±9.94       | 73.63±13.83      | 79.87±14.95         | 84.00±11.93   |
| HDL (mg/dL)               | 63.25±10.21      | 58.75±12.45      | 66.50±13.58         | 71.86±16.97   |
| Glucose (mg/dL)           | 178.75±63.3<br>2 | 165.00±39.4<br>7 | 226.07±62.05        | 177.31±58.73  |
| Triglycerides (mg/dL)     | 82.63±28.99      | 77.63±33.67      | 74.63±14.02         | 70.43±16.82   |

Data presented as mean ± SD (n=7-17)

Statistical significance based on genotype (\*wild type versus eNOS<sup>-/-</sup>; P<0.001)

## Figure Legends:

**Supplemental Table 1.** Characteristics of wild type and eNOS<sup>-/-</sup> mice treated with nitroglycerin. Body weight, blood pressure, total cholesterol, HDL, glucose and triglycerides were measured in wild type and eNOS<sup>-/-</sup> mice treated with or without nitroglycerine. Data is presented as mean ± SD (n=7-17, p<0.001).

## Supplementary References

[1] Otto A, Fontaine J, Tschirhart E, Fontaine D, Berkenboom G (2006) Rosuvastatin treatment protects against nitrate-induced oxidative stress in eNOS knockout mice: implication of the NAD(P)H oxidase pathway. *Br J Pharmacol* **148**, 544-552.

[2] d'Uscio LV, Smith LA, Katusic ZS (2011) Differential effects of eNOS uncoupling on conduit and small arteries in GTP-cyclohydrolase I-deficient hph-1 mice. *Am J Physiol Heart Circ Physiol*.

[3] Austin SA, Santhanam AV, Katusic ZS (2010) Endothelial nitric oxide modulates expression and processing of amyloid precursor protein. *Circ Res* **107**, 1498-1502.
